# Supplementary material for: Carbon nanofiber supported Ni–ZnO catalyst for efficient and selective hydrogenation of pyrolysis gasoline
Source: Royal Society of Chemistry journal article supplement (doi:10.1039/d1cy00548k), 2021-01-01
Supplement: d1cy00548k1.pdf [file d1cy00548k1.pdf]

Supporting Information

## **Carbon Nanofiber Supported Ni–ZnO Catalyst for Efficient and Selective Hydrogenation of Pyrolysis Gasoline**

Jie Wu,<sup>†,a,b</sup> Tianrong Li,<sup>†,a,\*</sup> Genping Meng,<sup>a</sup> Yongsheng Xiang,<sup>c</sup> Jun Hai,<sup>a</sup> and Baodui Wang<sup>a,\*</sup>

<sup>a</sup> *State Key Laboratory of Applied Organic Chemistry and Key Laboratory of Nonferrous Metal Chemistry and Resources Utilization of Gansu Province, Lanzhou University, Lanzhou 730000, China*

<sup>b</sup> *Tianshui Normal University, Tianshui 741099, China*

<sup>c</sup> *Lanzhou Petrochemical Research Center, PetroChina, Lanzhou 730060, China*

<sup>†</sup> These authors contributed equally to this work.

\* Corresponding authors.

*E-mail addresses:* [litr@lzu.edu.cn](mailto:litr@lzu.edu.cn) (T. Li), [wangbd@lzu.edu.cn](mailto:wangbd@lzu.edu.cn) (B. Wang).

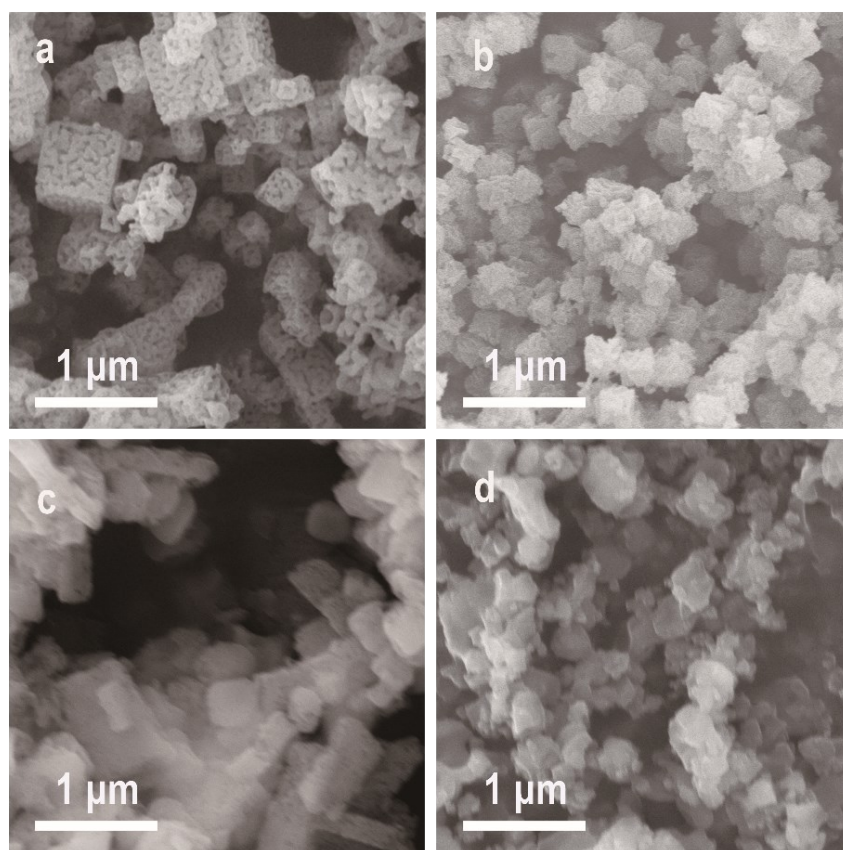

**Fig. S1.** SEM images of pure MOF-5 (a), Ni-MOF-5\_1 (b), Ni-MOF-5\_2 (c), Ni-MOF-5\_3 (d).

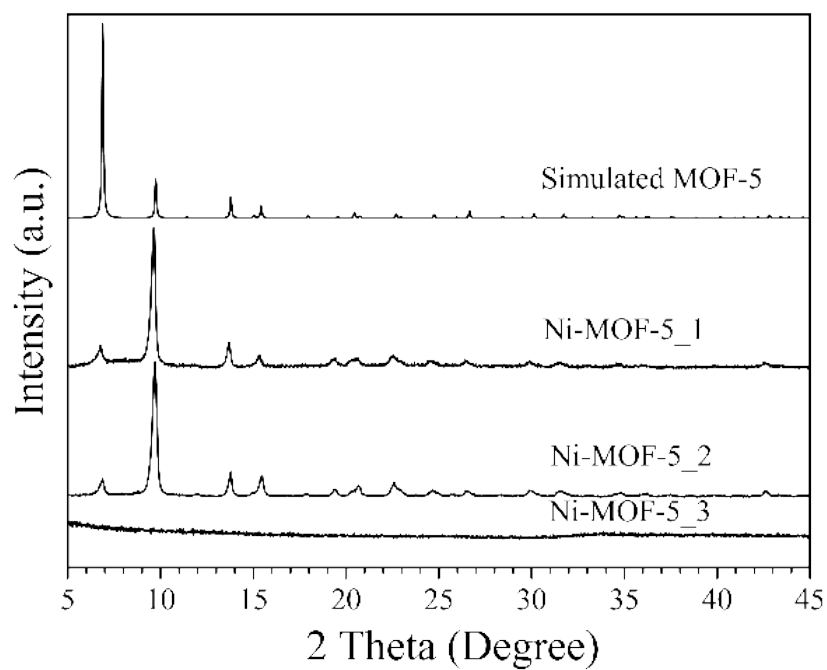

**Fig. S2.** XRD patterns of simulated MOF-5, Ni-MOF-5\_1, and Ni-MOF-5\_2 and Ni-MOF-5\_3.

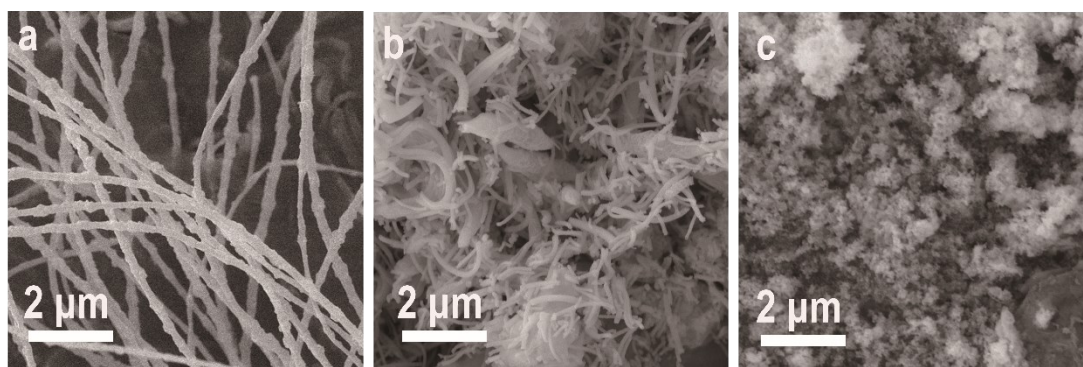

**Fig. S3.** SEM images of Ni-MOF-5\_1/PAN (a) and SEM images of the products of Ni-MOF-5\_1/PAN calcinated at 450 °C for 2 h (b), and at 500 °C for 1 h (c).

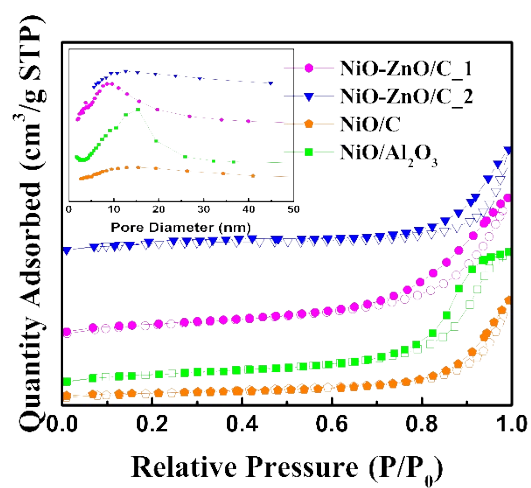

**Fig. S4.**  $N_2$  adsorption-desorption isotherms and BJH pore size distributions of NiO-ZnO/C\_1, NiO-ZnO/C\_2, NiO/C and NiO/Al<sub>2</sub>O<sub>3</sub>.

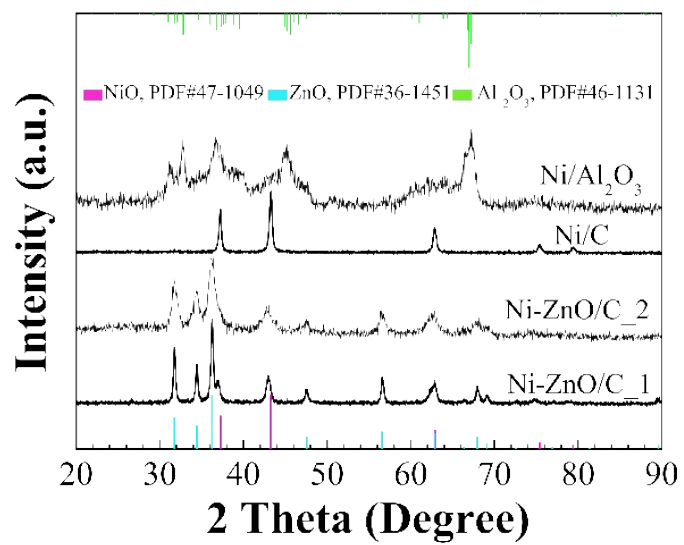

**Fig. S5.** XRD patterns of Ni-ZnO/C\_1, Ni-ZnO/C\_2, Ni/C, Ni/Al<sub>2</sub>O<sub>3</sub>, hexagonal structure of ZnO, cubic structure NiO, delta Al<sub>2</sub>O<sub>3</sub>, and theta Al<sub>2</sub>O<sub>3</sub>.

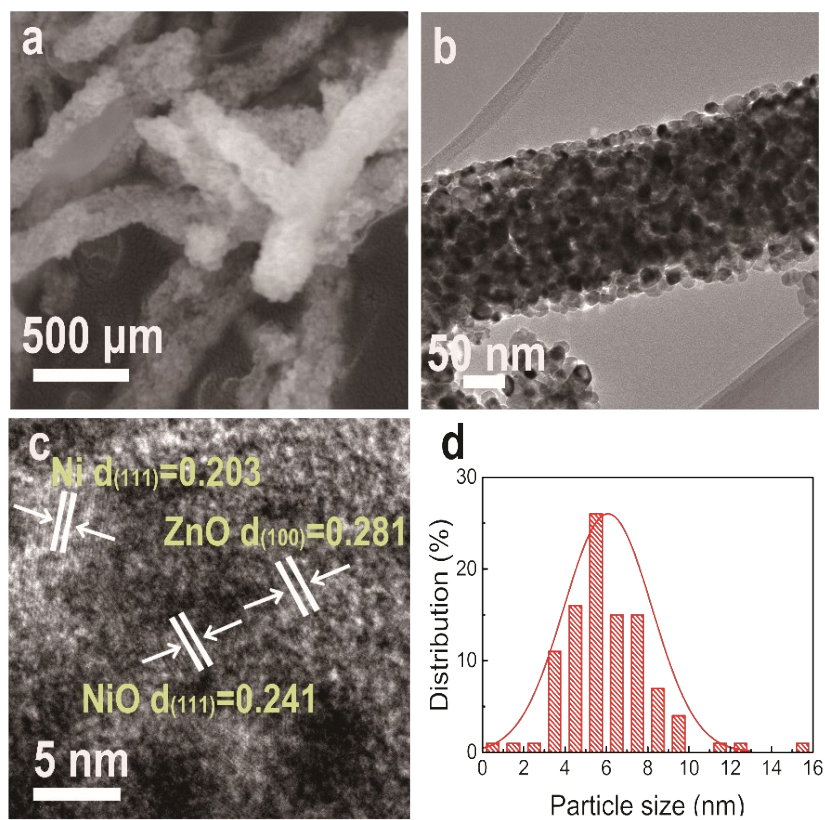

**Fig. S6.** SEM images (a), TEM images (b), high-resolution TEM images (c), and particle size distribution histogram (d) of Ni-ZnO/C<sub>2</sub>.

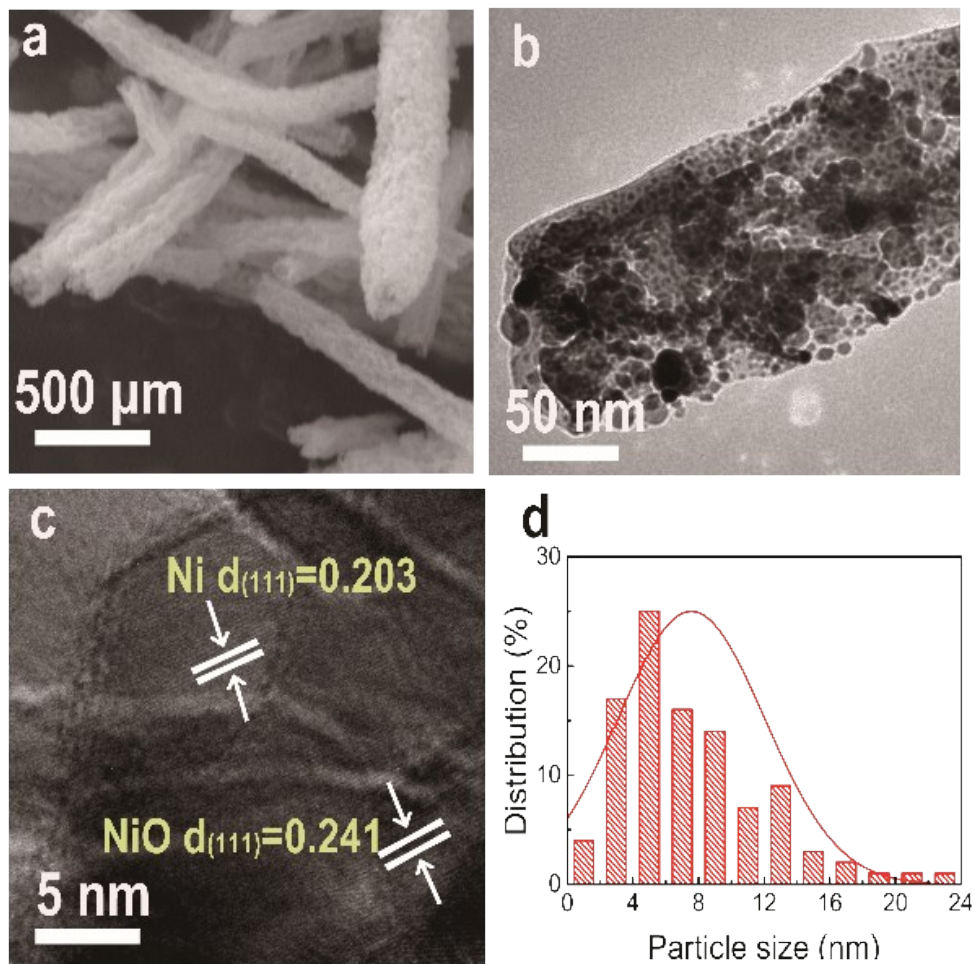

**Fig. S7.** SEM image (a), TEM image (b), high-resolution TEM image (c), and particle size distribution histogram (d) of Ni/C.



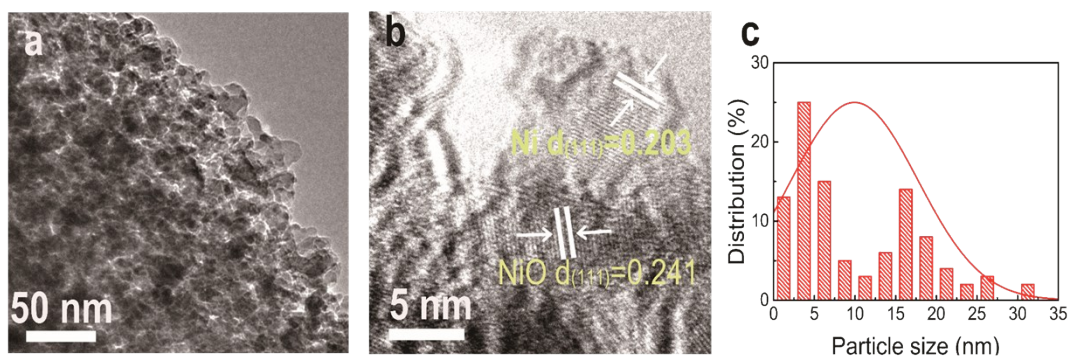

**Fig. S8.** TEM image (a), high-resolution TEM image (b), and particle size distribution histogram (c) of Ni/Al<sub>2</sub>O<sub>3</sub>.

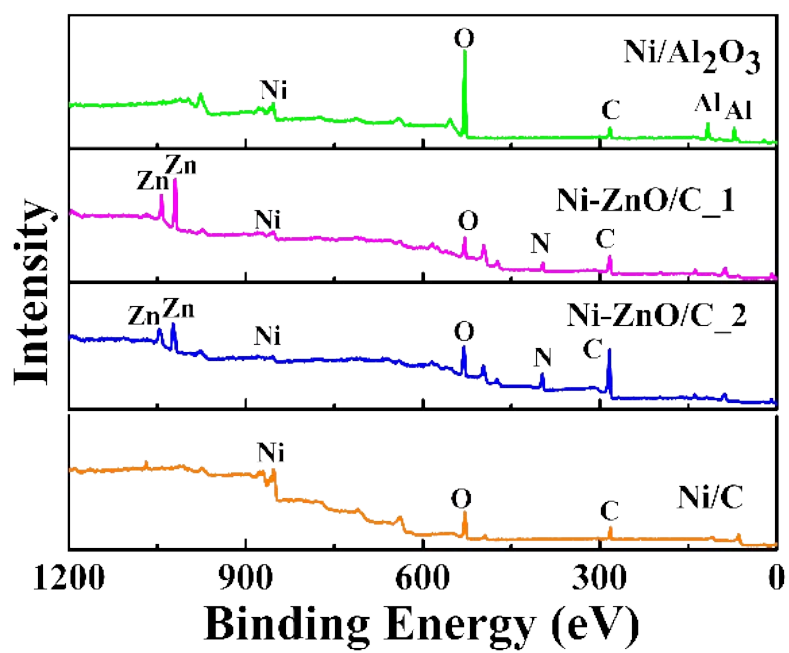

**Fig. S9.** XPS survey spectra of Ni-ZnO/C<sub>1</sub>, Ni-ZnO/C<sub>2</sub>, Ni/C and Ni/Al<sub>2</sub>O<sub>3</sub>.

**Table S1.** Chemical compositions and physical properties of Ni-MOF-5\_1, Ni-MOF-5\_2, and Ni-MOF-5\_3.

| Material   | Feed to MOF Synthesis<br>(mmol) |      | Ni/Zn<br>Molar Ratio |
|------------|---------------------------------|------|----------------------|
|            | Ni                              | Zn   |                      |
| Ni-MOF-5_1 | 0.76                            | 2.28 | 1:3                  |
| Ni-MOF-5_2 | 1.06                            | 1.98 | 1:2                  |
| Ni-MOF-5_3 | 1.52                            | 1.52 | 1:1                  |

**Table S2.** Chemical compositions and physical properties of different catalysts.

| Catalysts                         | Chemical Compositions (wt%) |      | BET Surface Area (m <sup>2</sup> /g) | Pore Size (nm) | Pore Volume (cm <sup>3</sup> /g) |
|-----------------------------------|-----------------------------|------|--------------------------------------|----------------|----------------------------------|
|                                   | Ni                          | Zn   |                                      |                |                                  |
| Ni-ZnO/C_1                        | 13.2                        | 34.6 | 96.65                                | 11.21          | 0.21                             |
| Ni-ZnO/C_2                        | 17.2                        | 27.1 | 49.63                                | 18.96          | 0.12                             |
| Ni/C                              | 20.1                        | -    | 29.00                                | 18.50          | 0.10                             |
| Ni/Al <sub>2</sub> O <sub>3</sub> | 13.7                        | 1.36 | 120.78                               | 12.40          | 0.39                             |
